# Supplementary material for: Impact of Lung-Related Polygenic Risk Scores on Chronic Obstructive Pulmonary Disease Risk and Their Interaction with w-3 Fatty Acid Intake in Middle-Aged and Elderly Individuals
Source: MDPI journal article supplement (doi:10.3390/nu15133062), 2023-07-07
Supplement: s1 [file s1]

## Supplementary Table S1. Stress-related questionnaires

The following 40 questionnaires to have the signs were answered for yes or no.

### 1. Stress-related behaviors for stress status

- Symptoms: Tension, anger, nervous indigestion.
- Triggers: People at work or home.
- Coping mechanisms: Eating, drinking, smoking.
- Symptoms: Tension, headaches, neck and shoulder pain, insomnia.
- Relaxation during leisure time.
- Difficulty concentrating on work due to worries.
- Medication use for tension relief.
- Limited time for relaxation.
- Inability to use spare time for relaxation.
- Rushed deadlines at work.

### 2. Psychological signs for stress status

- Always anxious.
- Easily gets excited or angry.
- Decreased concentration and patience.
- Severe absent-mindedness.
- Prone to depression and feeling down.
- Lack of motivation.
- Excessive doubts and hesitation.
- Low self-confidence and tendency to give up.
- Inability to relax without doing something.
- Impulsive judgments.

### 3. Physical signs for stress status

- Shortness of breath.
- Dry throat or mouth.
- Insomnia.
- Frequent headaches.

- Easily fatigued eyes.
- Shoulder and neck stiffness.
- Chest tightness and nausea.
- Decreased appetite.
- Constipation or diarrhea.
- Fatigue and sluggishness

#### 4. Behavioral signs

- Increased arguments, complaints, and backtalk.
- More mistakes in work.
- Increased alcohol intake.
- Overly engrossed in work.
- Decreased speech and deep in thought.
- Increased talking and forceful opinions.
- Easily angered by trivial matters.
- Decreased interest in grooming and appearance.
- More personal calls or restroom visits at work.
- Increased absences, tardiness, or early departures (neglecting household chores or farming).

Supplementary Table S2. Generalized multifactor dimensionality reduction (GMDR) results of multi-locus interaction with genes related to COPD risk

|                                                                                                          | TRBA   | TEBA   | P value | CVC |                                                                                                          | TRBA   | TEBA   | P value | CVC |
|----------------------------------------------------------------------------------------------------------|--------|--------|---------|-----|----------------------------------------------------------------------------------------------------------|--------|--------|---------|-----|
| <i>CAVI</i> _rs1997571                                                                                   | 0.5307 | 0.5022 | 0.623   | 5   | <i>CAVI</i> _rs1997571                                                                                   | 0.5329 | 0.5062 | 0.1719  | 5   |
| <i>MTCL1</i> _rs17482826,<br><i>FAM13A</i> _rs1585258                                                    | 0.5493 | 0.549  | 0.011   | 10  | <i>MTCL1</i> _rs17482826,<br><i>FAM13A</i> _rs1585258                                                    | 0.5475 | 0.5252 | 0.0107  | 6   |
| <i>ITGA1</i> _rs889294,<br><i>CAVI</i> _rs1997571,<br><i>CPD</i> _rs719601                               | 0.5591 | 0.5265 | 0.0547  | 5   | <i>ITGA1</i> _rs889294,<br><i>CAVI</i> _rs1997571,<br><i>CPD</i> _rs719601                               | 0.5613 | 0.5374 | 0.001   | 7   |
| <i>FAM13A</i> _rs1585258,<br><i>CAVI</i> _rs1997571,<br><i>CPD</i> _rs719601,<br><i>PEPD</i> _rs10405598 | 0.5784 | 0.5177 | 0.377   | 4   | <i>FAM13A</i> _rs1585258,<br><i>CAVI</i> _rs1997571,<br><i>CPD</i> _rs719601,<br><i>PEPD</i> _rs10405598 | 0.5785 | 0.5259 | 0.0547  | 5   |
| <i>ITGA1</i> _rs889294 plus Model 4                                                                      | 0.6133 | 0.54   | 0.001   | 10  | <i>ITGA1</i> _rs889294 plus Model 4                                                                      | 0.6109 | 0.543  | 0.001   | 10  |
| <i>MTCL1</i> _rs17482826 plus<br>Model 5                                                                 | 0.6503 | 0.5494 | 0.011   | 9   | <i>MTCL1</i> _rs17482826 plus<br>Model 5                                                                 | 0.6448 | 0.5352 | 0.001   | 7   |
| <i>PTPRD</i> _rs10959052 plus<br>Model 6                                                                 | 0.686  | 0.5461 | 0.001   | 10  | <i>PTPRD</i> _rs10959052 plus<br>Model 6                                                                 | 0.6805 | 0.5387 | 0.001   | 10  |
| <i>ABCA13</i> _rs4145714 plus<br>Model 7                                                                 | 0.7175 | 0.5443 | 0.001   | 10  | <i>ABCA13</i> _rs4145714 plus<br>Model 7                                                                 | 0.7132 | 0.5493 | 0.001   | 10  |
| <i>ZNF385D</i> _rs117262613 plus<br>Model 8                                                              | 0.73   | 0.5401 | 0.001   | 9   | <i>ZNF385D</i> _rs117262613 plus<br>Model 8                                                              | 0.7241 | 0.543  | 0.001   | 9   |
| <i>NTM</i> _rs74433025 plus Model 9                                                                      | 0.7404 | 0.5438 | 0.001   | 10  | <i>NTM</i> _rs74433025 plus Model 9                                                                      | 0.7337 | 0.5415 | 0.001   | 10  |

Adjusted for age, gender, BMI, education, and residence area for model 1. Adjusted for covariates for Model 1 plus energy intake, alcohol intake, smoking, medication for asthma, and exercise.
